# Supplementary material
Source: PubMed Central journal article supplement (PMC4917438)
Supplement: NIHMS762295-supplement-Supp_Info.pdf [file NIHMS762295-supplement-Supp_Info.pdf]

**Supplementary Table 1.** Univariate predictors of incident cirrhosis<sup>1</sup>, adjusted for baseline FIB-4 score

| Variable†                                      | HR   | 95% CI    | p-value |
|------------------------------------------------|------|-----------|---------|
| Age, per 10 year increase                      | 1.03 | 0.95,1.11 | 0.48    |
| Race                                           |      |           |         |
| • White (comparator)                           | 1    |           |         |
| • Black                                        | 1.13 | 1,1.29    | 0.05    |
| • Hispanic                                     | 1.07 | 0.87,1.31 | 0.52    |
| • Other                                        | 0.97 | 0.82,1.14 | 0.68    |
| Male sex                                       | 1.28 | 0.96,1.72 | 0.1     |
| HCV RNA, per log <sub>10</sub> increase        | 1.09 | 1.06,1.12 | <.0001  |
| HCV genotype                                   |      |           |         |
| • 1a                                           | 1    |           |         |
| • 1b                                           | 0.9  | 0.73,1.1  | 0.28    |
| • 1ns                                          | 0.89 | 0.67,1.17 | 0.41    |
| • 2                                            | 0.75 | 0.61,0.93 | 0.01    |
| • 3                                            | 0.92 | 0.74,1.16 | 0.49    |
| • 4-6                                          | 0.86 | 0.39,1.94 | 0.72    |
| • Unknown                                      | 0.67 | 0.59,0.76 | <.0001  |
| Body mass index, per unit increase             | 1    | 0.99,1.01 | 0.59    |
| Dyslipidemia, baseline                         | 1.07 | 0.97,1.18 | 0.19    |
| Diabetes                                       | 1.19 | 1.05,1.34 | 0.01    |
| NAFLD                                          | 1.16 | 0.96,1.39 | 0.12    |
| Alcohol abuse or dependence                    | 1.32 | 1.2,1.46  | <.0001  |
| Smoking history (any vs. none)                 | 1.4  | 1.16,1.7  | 0.0006  |
| Daily caffeine intake (any vs. none)           | 1.84 | 1.22,2.78 | 0.004   |
| Prior HCV treatment                            |      |           |         |
| • IFN/RBV only                                 | 1    |           |         |
| • IFN/RBV/BOC                                  | 0.94 | 0.76,1.15 | 0.53    |
| • IFN/RBV/TPV                                  | 1.44 | 0.95,2.2  | 0.09    |
| Treatment naïve (vs. experienced)              | 0.87 | 0.66,1.15 | 0.34    |
| Attainment of SVR (vs. no SVR)                 | 0.49 | 0.44,0.54 | <.0001  |
| <b>Medication use<sup>3</sup></b>              |      |           |         |
| Statins                                        | 0.66 | 0.6,0.73  | <.0001  |
| Angiotensin converting enzyme (ACE) inhibitors | 0.99 | 0.89,1.09 | 0.78    |
| Metformin                                      | 1.04 | 0.93,1.16 | 0.53    |
| Other lipid-lowering agent <sup>4</sup>        | 0.83 | 0.7,0.99  | 0.04    |
| Non-steroidal anti-inflammatory (NSAID)        | 1.12 | 0.95,1.32 | 0.19    |

†Variables were included if present at any time during study period, unless noted otherwise

<sup>1</sup>Cirrhosis defined as FIB-4 score > 3.5

<sup>2</sup>NAFLD, Non-alcoholic fatty liver disease, as defined by ICD-9 code

<sup>3</sup>Medication use included use of any listed medications, at any time during study period, vs. non-use

<sup>4</sup> Other lipid-lowering agents include: fibrates (clofibrate, fenofibrate, gemfibrozil), niacin, ezetimibe, bile acid sequestrants (cholestyramine, colesevelam, colestipol)

**Supplementary Table 2A and 2B**

Hazard Ratio (HR) of statin use and reduction of (A) fibrosis progression, and (B) hepatocellular carcinoma (HCC), after exclusion of subjects who attained SVR

2A.

| Model                    | Statin use <sup>1</sup>    |         |                             |         |                        |         |
|--------------------------|----------------------------|---------|-----------------------------|---------|------------------------|---------|
|                          | 28 to 89 cDDD <sup>2</sup> |         | 90 to 180 cDDD <sup>2</sup> |         | >180 cDDD <sup>2</sup> |         |
|                          | HR (95% CI)                | p-value | HR (95% CI)                 | p-value | HR (95% CI)            | p-value |
| Adjusted HR <sup>†</sup> | 0.82 (0.41,1.64)           | 0.58    | 0.48 (0.24,0.96)            | 0.04    | 0.56 (0.38,0.83)       | 0.004   |

<sup>†</sup>Adjusted model created after exclusion of subjects who attained SVR. Model adjusted for age, sex, race, smoking history, alcohol abuse history, caffeine intake, BMI, Diabetes, baseline FIB-4 score, Metformin use, Angiotensin converting enzyme inhibitor use, other lipid-lowering agent use, NSAID use and prior completed HCV treatment

<sup>1</sup>Statin use defined as  $\geq 28$  cumulative defined daily doses (cDDD<sup>2</sup>) of statin medications, over study observation period

<sup>2</sup>cDDD<sup>2</sup>, cumulative defined daily doses

2B.

| Variable, N                       | Fibrosis progression <sup>1</sup><br>N (%) | Unadjusted HR          |                 |         | Adjusted HR*           |                 |         |
|-----------------------------------|--------------------------------------------|------------------------|-----------------|---------|------------------------|-----------------|---------|
|                                   |                                            | $\beta$<br>coefficient | HR (95% CI)     | P-value | $\beta$<br>coefficient | HR (95% CI)     | P-value |
| Statin use <sup>1</sup> ,<br>1870 |                                            |                        |                 |         |                        |                 |         |
| cDDD 28-89,<br>257                | 52 (20.23%)                                | -0.48                  | 0.62(0.47,0.82) | 0.0009  | -0.34                  | 0.71(0.54,0.95) | 0.02    |
| cDDD 90-180,<br>364               | 79(21.7%)                                  | -0.40                  | 0.67(0.53,0.85) | 0.0008  | -0.28                  | 0.76(0.6,0.96)  | 0.02    |
| cDDD >180,<br>1249                | 212<br>(16.97%)                            | -0.71                  | 0.49(0.42,0.57) | <.0001  | -0.68                  | 0.51(0.43,0.6)  | <.0001  |
| No Statin use;<br>2608            | 770<br>(29.52%)                            |                        | 1               |         |                        | 1               |         |

\*Adjusted model created after exclusion of subjects who attained SVR. Model adjusted for age, sex, race, smoking history, alcohol abuse history, caffeine intake, BMI, Diabetes, baseline FIB-4 score, Metformin use, Angiotensin converting enzyme inhibitor use, other lipid-lowering agent use, NSAID use and prior completed HCV treatment

<sup>1</sup>Statin use defined as  $\geq 28$  cumulative defined daily doses (cDDD<sup>2</sup>) of statin medications, over study observation period

<sup>2</sup>cDDD<sup>2</sup>, cumulative defined daily doses

**Supplementary Figure 1.**

Mean FIB-4 scores of included subjects (n=9135) over time, according to statin cumulative defined daily dose (cDDD)†

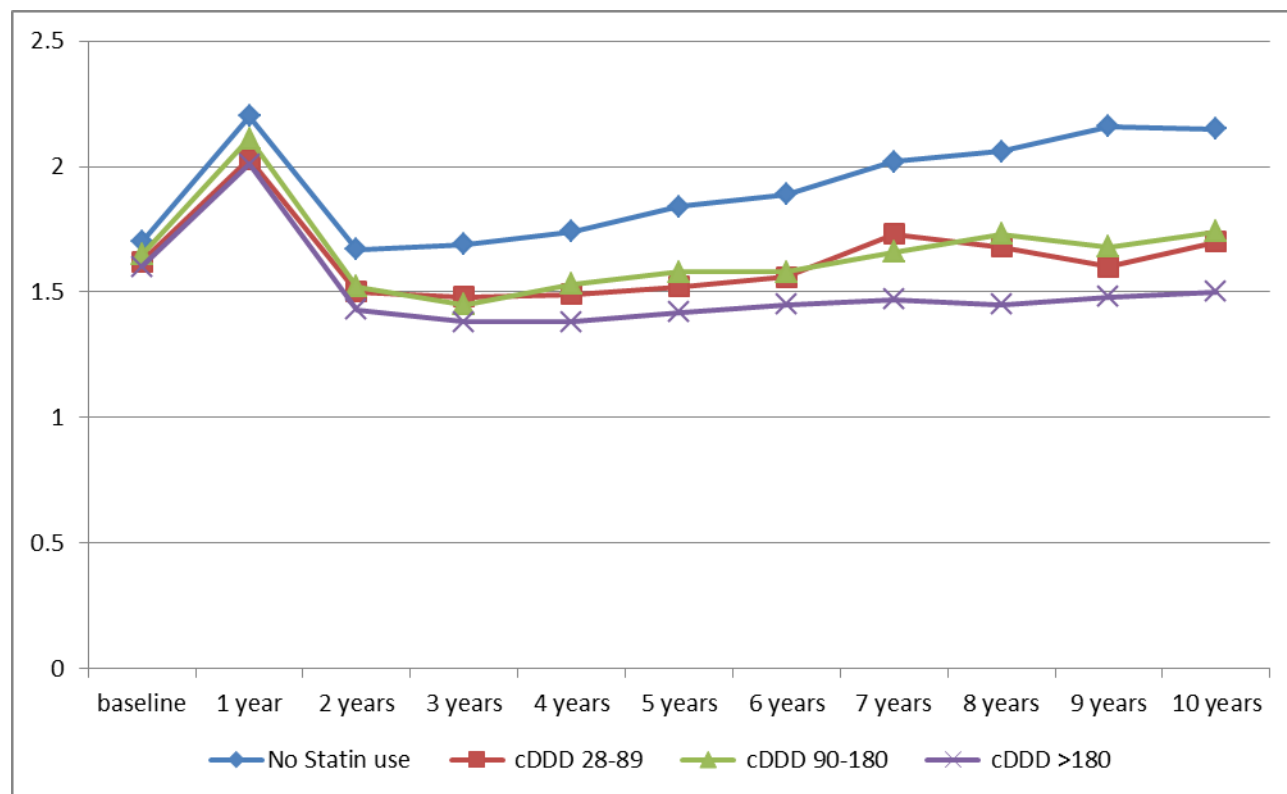

†Using ANOVA test, all p-values for each of the four cDDD groups are <0.0001, at each time point during the 13-year study observation period
